# Supplementary material
Source: publisher figshare collection journal article supplement (https://geolsoc.figshare.com/ndownloader/files/5421356)
Supplement: Supplementary file 1 [file 5421356]

## Sheet: sed_rate_estimates_whole_rock S
X	Y	Basin	type	Albsedrate	Albturbres	Albacctypr	Albunc	CenConsedr	CenConturb	CenConacct	CenConunc	SanMaasedr	SanMaaturb	SanMaaunc	SanMaaacct	Palsedrate	Palturb	Palacctype	Palunc	Eosedrate	Eoturbres	Eoacctype	Eounc	Oligsedrat	Oligturbre	Oligacctyp	Oligunc	EMiosedrat	EMioturbre	EMioacctyp	EMiounc	MLMiosedra	MLMioturbr	MLMioaccty	MLMiounc	PlPlsedrat	PlPlturbre	PlPlacctyp	PlPlunc	Confidence	Reference
0	0	Santos South	point	0		P		0		R		0	TS		P	0		R	U-57	0	TS	P		0		A	U-32	0		A		53		P		53		P		E	Modica et al, Bull AAPG, 88,7, 923-945
0	0	Santos Main	cross-section	54	TS	P		65	TS	R	U-88	185	TS	U-76	P	35		P	U-57	33		P	U-41	11		A	U-32	10		R		13		A		48		P		D	Mohriak in Bizzi 2003, Geologica, Tectonica et Rec. Min, do Brasil, CRPM
0	0	Campos	cross-section	30		A		23	TS	R	U-93	25	TS	U-80	P	36		A	U-55	10	TS	P		13	TS	P	U-34	36	TS	P	U-23	22	TS	P	U-11	26		P	U-5	D	Mohriak in Bizzi 2003, Geologica, Tectonica et Rec. Min, do Brasil, CRPM
0	0	Regencia Canyon	point	0		A		0		R		0		U-72	R	0		A	U-60	0	TS	P	U-45,50,55	0		P		0		P		0		P		0		P		E	Bruhn et al 1997, Sedimentology, 44, 17-46
0	0	Espirito Santo	cross-section	20		R		35		R		56		U-75	R	18		A	U-65	18	TS	P		18	TS	P		18		P		18		P		18		P		D	Mohriak in Bizzi 2003, Geologica, Tectonica et Rec. Min, do Brasil, CRPM
0	0	Camamu	cross-section	24		R		10		R	U-92	20			A	29		A	U-65	12		A	U	12		A	U-32	11		P		11		P	U-13	11		P		D	Mohriak in Bizzi 2003, Geologica, Tectonica et Rec. Min, do Brasil, CRPM
0	0	Almada	point	0		P		7		R	U-92	20		U-78	A	24		A	U-64	17		A	U-45	11		A	U-33	10		P		10		P	U-11	6		P		D	Netto et al, 1991, Rev Bras de Geosc, 21, 2, 186-198
0	0	Sergipe	seismic	27		R		27		R		44	TS	U-86	P	27	TS	P		12	TS	P		12		P	U-32	12		P	U-16	12		P		12		P		D	Mohriak in Bizzi 2003, Geologica, Tectonica et Rec. Min, do Brasil, CRPM
0	0	Pernambuco d/w	cross-section	0		A		13		A	U-92	5			A	5		A	U-65	6		A		6		A		12		A		12		A		30		A		D	Mohriak in Bizzi 2003, Geologica, Tectonica et Rec. Min, do Brasil, CRPM
0	0	Ceara, max	basin c/strat	95		A		60		R		95		U-80,70	A	14		A	U-68	34		P	U-46	34		P	U-26	35		P		60		P	U-10	85		P		E	Milani et al, Bull Geoci Petrobras, 15,2, 347-355
0	0	Barreirinhas		70		A		15		R		15		U-70	A	43		A		43		A	U-40	24		A		24		A		24		A		24		P		D	Mohriak in Bizzi 2003, Geologica, Tectonica et Rec. Min, do Brasil, CRPM
0	0	Foz de Amazonas	cross-section	0		A		0		A		53			A	47		A		48		A		48		A		37		A		250		P		481		P		C	Mohriak in Bizzi 2003, Geologica, Tectonica et Rec. Min, do Brasil, CRPM
0	0	Campos	point	0		A		12		A		12			A	9		A	U-60	10		A		12		A		56		A		8		A		8		A		E	Mohriak in Bizzi 2003, Geologica, Tectonica et Rec. Min, do Brasil, CRPM
0	0	Esp Santo	point	15		A		20		A		20			A	17		A		17		A		17		A		17		A		17		A		17		A		E	Mohriak in Bizzi 2003, Geologica, Tectonica et Rec. Min, do Brasil, CRPM
0	0	Mucuri, max	chrono	0		A		0		R		23			A	110		A	U-65	44		P	U-55	48		P	U-34	48		P		48		P		48		P		E	Mohriak in Bizzi 2003, Geologica, Tectonica et Rec. Min, do Brasil, CRPM
0	0	Santos	wells	14				26				50				55				10				10				10				24				24				E	Williams et al, 1984, Mar Petr Geol, 1, 90-104
0	0	Campos	wells	54				9				4				2				20				24				46				28				32				E	Mohriak,1990, Geol Soc SP 50, 119-141
0	0	Sergipe	cross-section	13				13				12				12				12				20				43				45				48				D	Mohriak, 1995, J Geodynamics, 20, 4, 515-539
0	0	Sergipe	seismic	33				16				16				14				14				29				10				10				10				D	Mohriak, 2003, AAPG Memoir 73, Chapter 20
0	0	Espirito Santo	cross-section	0				0				5				23				70				30				30				30				30				D	Bruhn et al 1997, Sedimentology, 44, 17-46
0	0	Santos North	seismic	0				17				34				30				15				10				14				14				14				B	Modica et al, Bull AAPG, 88,7, 923-945
0	0	Sergipe basin	cross-section	6				10				10				37				5				29				9				9				9				C	Mohriak in Bizzi 2003, Geologica, Tectonica et Rec. Min, do Brasil, CRPM
0	0	Colorado deep	isopachs	46				32				32				24				3				11				3				3				3				A	Autin, pers comm, 2010, SAMPLE conference, Kiel
0	0	Colorado rift	isopachs	34				22				22				11				9				30				2				2				2				A	Autin, pers comm, 2010, SAMPLE conference, Kiel
0	0	Rio de la Plata	seismic line	8				8				8				119				26				26				26				26				26				D	www.geolsoc.org.uk/petroleum/South_Atlantic%20Nov%2007.pdf
0	0	Malvinas N	isopachs	1.5				1.5				1.5				1				1				9				9				9				2				A	Baristeas, pers comm, 2010, SAMPLE conference, Kiel
0	0	Malvinas S	isopachs	4				4				4				3				3				12				12				12				45				A	Baristeas, pers comm, 2010, SAMPLE conference, Kiel
0	0	Sergipe shelf	cross-section	11				15				15				15				18				19				19				8				8				D	Mohriak, 2003, AAPG Memoir 73, Chapter 20
0	0	Sergipe	well -seismic	0				13				16				123				26				11				11				11				38					Cruz et al, 2008, PhD thesis, 24/PPGG, Univ Fed do Rio Grande do Norte
0	0	Pelotas	seismic	0				20				21				32				35				9				32				30				47					Rosa et al,2006, Gravel, 4,1, 109-118
0	0	Pelotas	seismic line	0				26		A		11			A	31		P	U-58	32		P		46				58		P		59		P		47		P			Contreras et al 2010, Mar Pet Geol, 27, 1952-1980
